# Supplementary material for: In-materio reservoir working at low frequencies in a Ag2S-island network
Source: Royal Society of Chemistry journal article supplement (doi:10.1039/d2nr01439d), 2022-01-01
Supplement: d2nr01439d1.pdf [file d2nr01439d1.pdf]

## Supplemental Information

### In-Materio Reservoir Working at Low Frequencies in a Ag<sub>2</sub>S-island Network

Motoharu Nakajima,<sup>a</sup> Kazuki Minegishi,<sup>a</sup> Yosuke Shimizu,<sup>a</sup> Yuki Usami,<sup>b,c</sup> Hirofumi Tanaka,<sup>b,c</sup> and Tsuyoshi Hasegawa<sup>\*a</sup>

<sup>a</sup>Department of Pure and Applied Physics, Graduate School of Advanced Science and Engineering, Waseda University, 3-4-1 Okubo, Shinjuku-ku, Tokyo 169-8555, Japan

<sup>b</sup>Department of Human Intelligence Systems, Graduate School of Life Science and Systems Engineering, Kyushu Institute of Technology, 2-4 Hibikino, Wakamatsu, Kitakyushu 808-0196, Japan

<sup>c</sup>Research Center for Neuromorphic AI Hardware, Kyushu Institute of Technology

#### 1. Characteristics of the Ag<sub>2</sub>S island network of 30 μm in diameter

Similar to the 1 μm-Ag<sub>2</sub>S island network, a 30 μm-Ag<sub>2</sub>S island network showed the dependence of  $\Delta R$  on the frequency and amplitude of inputs. Figure S1 shows the change in  $\Delta R$  as a function of input frequency. As can be seen,  $\Delta R$  of the 30 μm-network, indicated by red open triangles, shows almost the same characteristics with  $\Delta R$  of the 1 μm-network, indicated by blue open triangles. Figure S2 shows the change in  $\Delta R$  of the 30 μm-network as a function of the input amplitude, which also shows the similar characteristic with that of the 1 μm-network shown in Fig. 4b. These results suggest the expansion capability of a Ag<sub>2</sub>S island network as a reservoir.

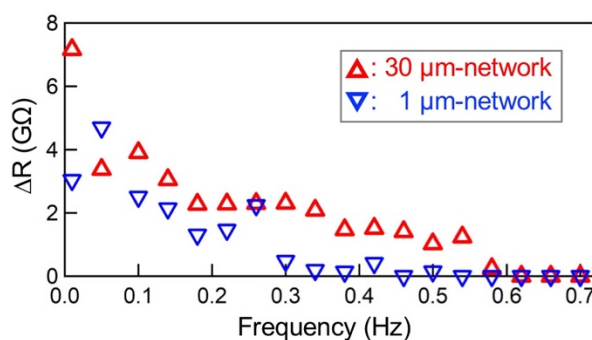

Figure S1. Change in  $\Delta R$  as a function of frequency.

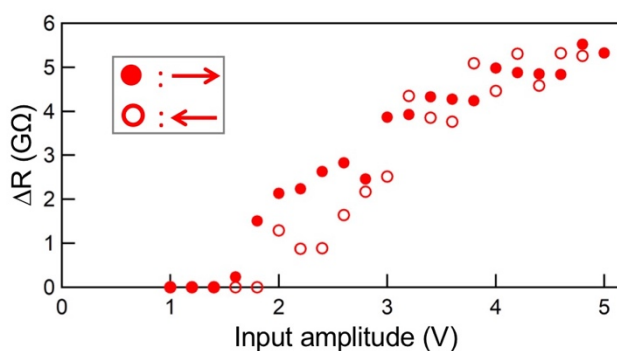

Figure S2. Change in  $\Delta R$  as a function of input amplitude.

## 2. Logic operations using the Ag<sub>2</sub>S island network of 30 μm in diameter with sixteen electrodes

### 2.1 Logic operations at 0.2 Hz

Fourteen outputs,  $O_1 - O_{14}$  that are shown in Fig. 6c, are shown in each panel of Fig. S3. Optimized weights,  $w_1 - w_{14}$ , and bias,  $w_0$ , used for each logic operation are listed in Table. S1.

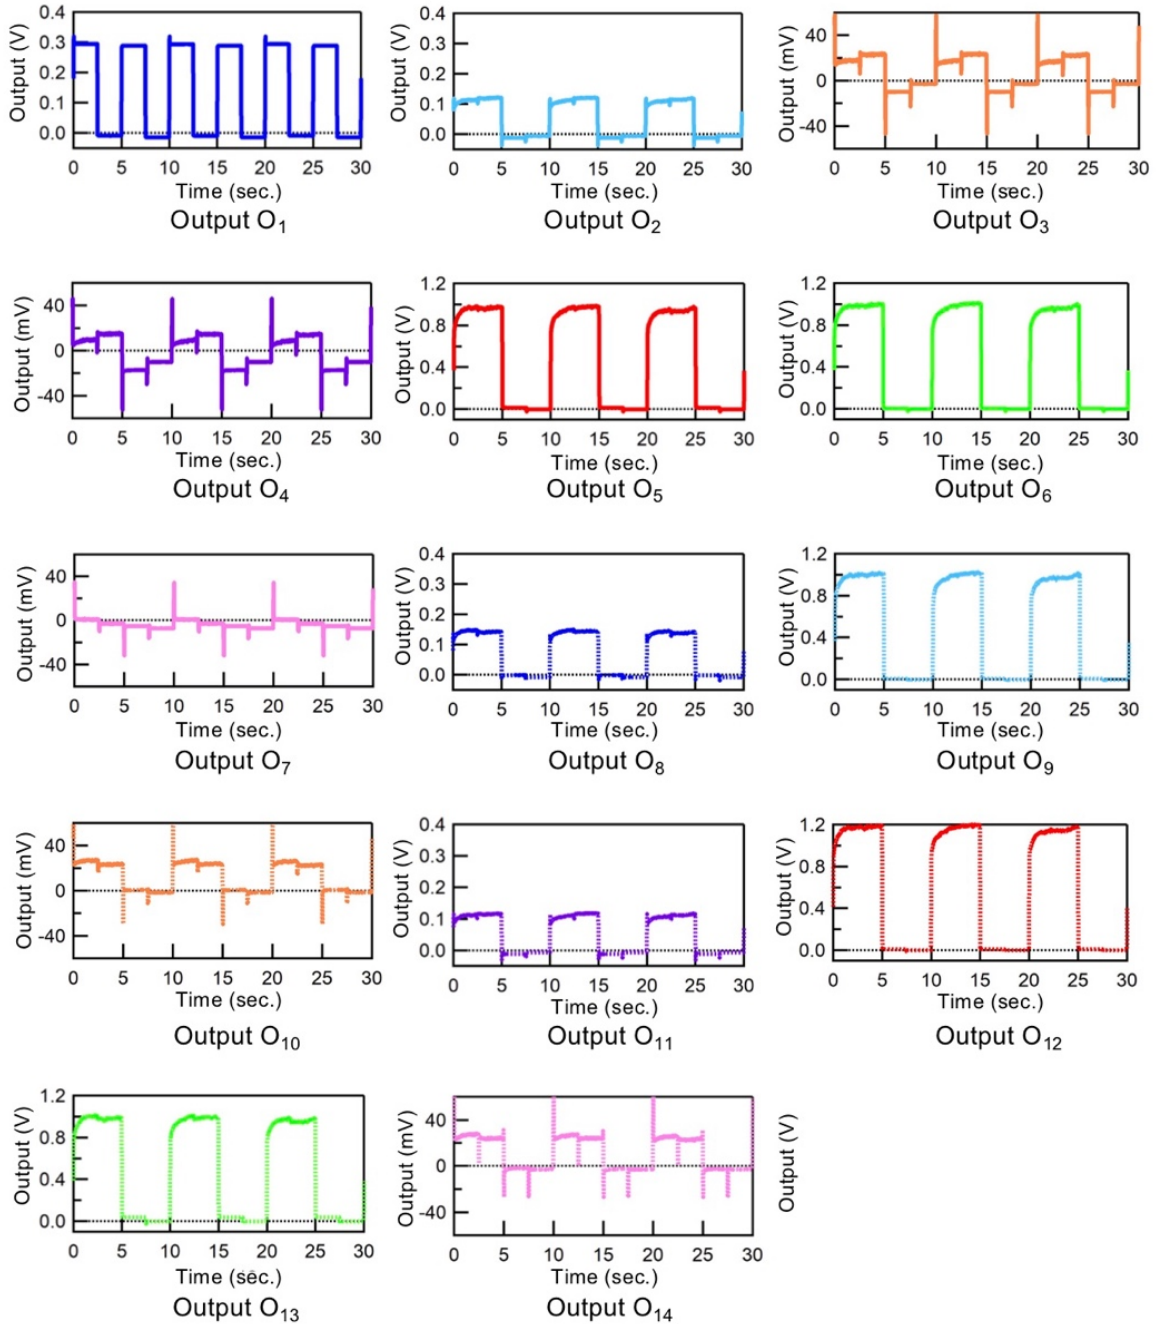

Figure S3. Fourteen outputs used in the synthesis of the six logic operations shown in Fig. 7.

Table S1. Weights and a bias used for the logic operations shown in Fig. 7.

|          | AND           | NAND          | OR          | NOR         | XOR           | XNOR          |
|----------|---------------|---------------|-------------|-------------|---------------|---------------|
| $w_1$    | 14.27271444   | -14.27271444  | -16.2438729 | 16.2438729  | -30.5165873   | 30.5165873    |
| $w_2$    | 32.09701703   | -32.09701703  | -38.9124885 | 38.9124885  | -71.00950554  | 71.00950554   |
| $w_3$    | -166.6766858  | 166.6766858   | 107.122603  | -107.122603 | 273.79928876  | -273.79928876 |
| $w_4$    | -74.90677803  | 74.90677803   | 69.8550458  | -69.8550458 | 144.76182379  | -144.76182379 |
| $w_5$    | 132.00542533  | -132.00542533 | -109.303097 | 109.303097  | -241.30852252 | 241.30852252  |
| $w_6$    | -24.41800565  | 24.41800565   | 24.0349571  | -24.0349571 | 48.4529628    | -48.4529628   |
| $w_7$    | -19.29269241  | 19.29269241   | 7.29002473  | -7.29002473 | 26.58271714   | -26.58271714  |
| $w_8$    | 0.95773778    | -0.95773778   | -18.2128497 | 18.2128497  | -19.17058752  | 19.17058752   |
| $w_9$    | 8.3724351     | -8.3724351    | -71.9385144 | 71.9385144  | -80.31094952  | 80.31094952   |
| $w_{10}$ | 193.58686444  | -193.58686444 | -106.122638 | 106.122638  | -299.70950214 | 299.70950214  |
| $w_{11}$ | 73.36477611   | -73.36477611  | -49.1073162 | 49.1073162  | -122.47209235 | 122.47209235  |
| $w_{12}$ | 71.78217991   | -71.78217991  | -61.8458743 | 61.8458743  | -133.62805425 | 133.62805425  |
| $w_{13}$ | -213.02184081 | 213.02184081  | 245.487179  | -245.487179 | 458.50902014  | -458.50902014 |
| $w_{14}$ | 41.57756917   | -41.57756917  | -50.8160186 | 50.8160186  | -92.39358777  | 92.39358777   |
| $w_0$    | -0.50957948   | 0.991970      | 0.183284762 | 1.000170    | 0.69286424    | 0.995001      |

## 2.2 Logic operations at 2 Hz

Logic operations used higher frequency (2Hz) are shown in Fig. S4. Two inputs and fourteen outputs are shown in Fig. S5. Weights and a bias used for the synthesis are listed in Table S2.

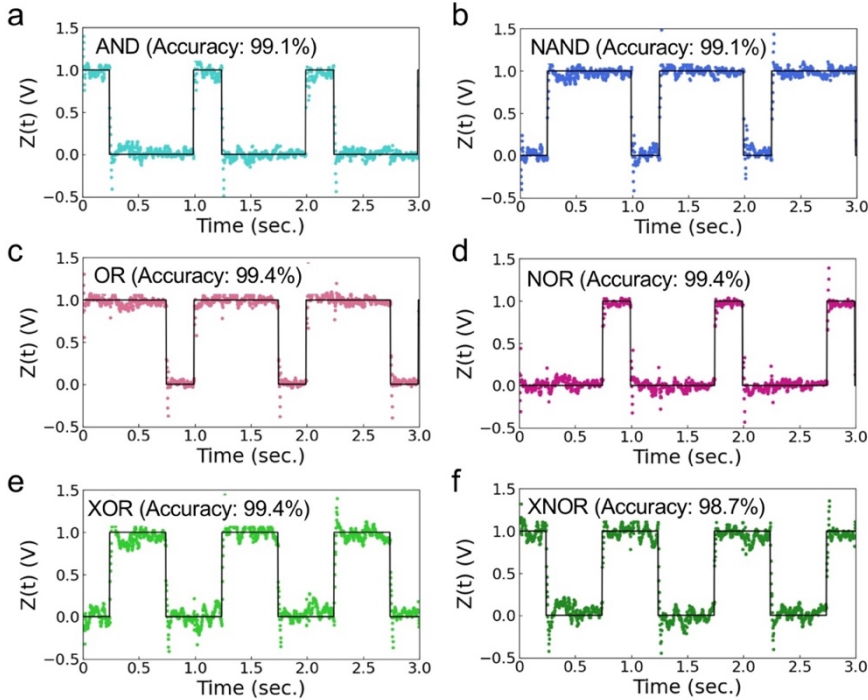

Figure S4. Logic operations using inputs of 2 Hz. Synthesized curves are shown by colored curve in each panel. The target in each logic operation is shown by the black solid lines.

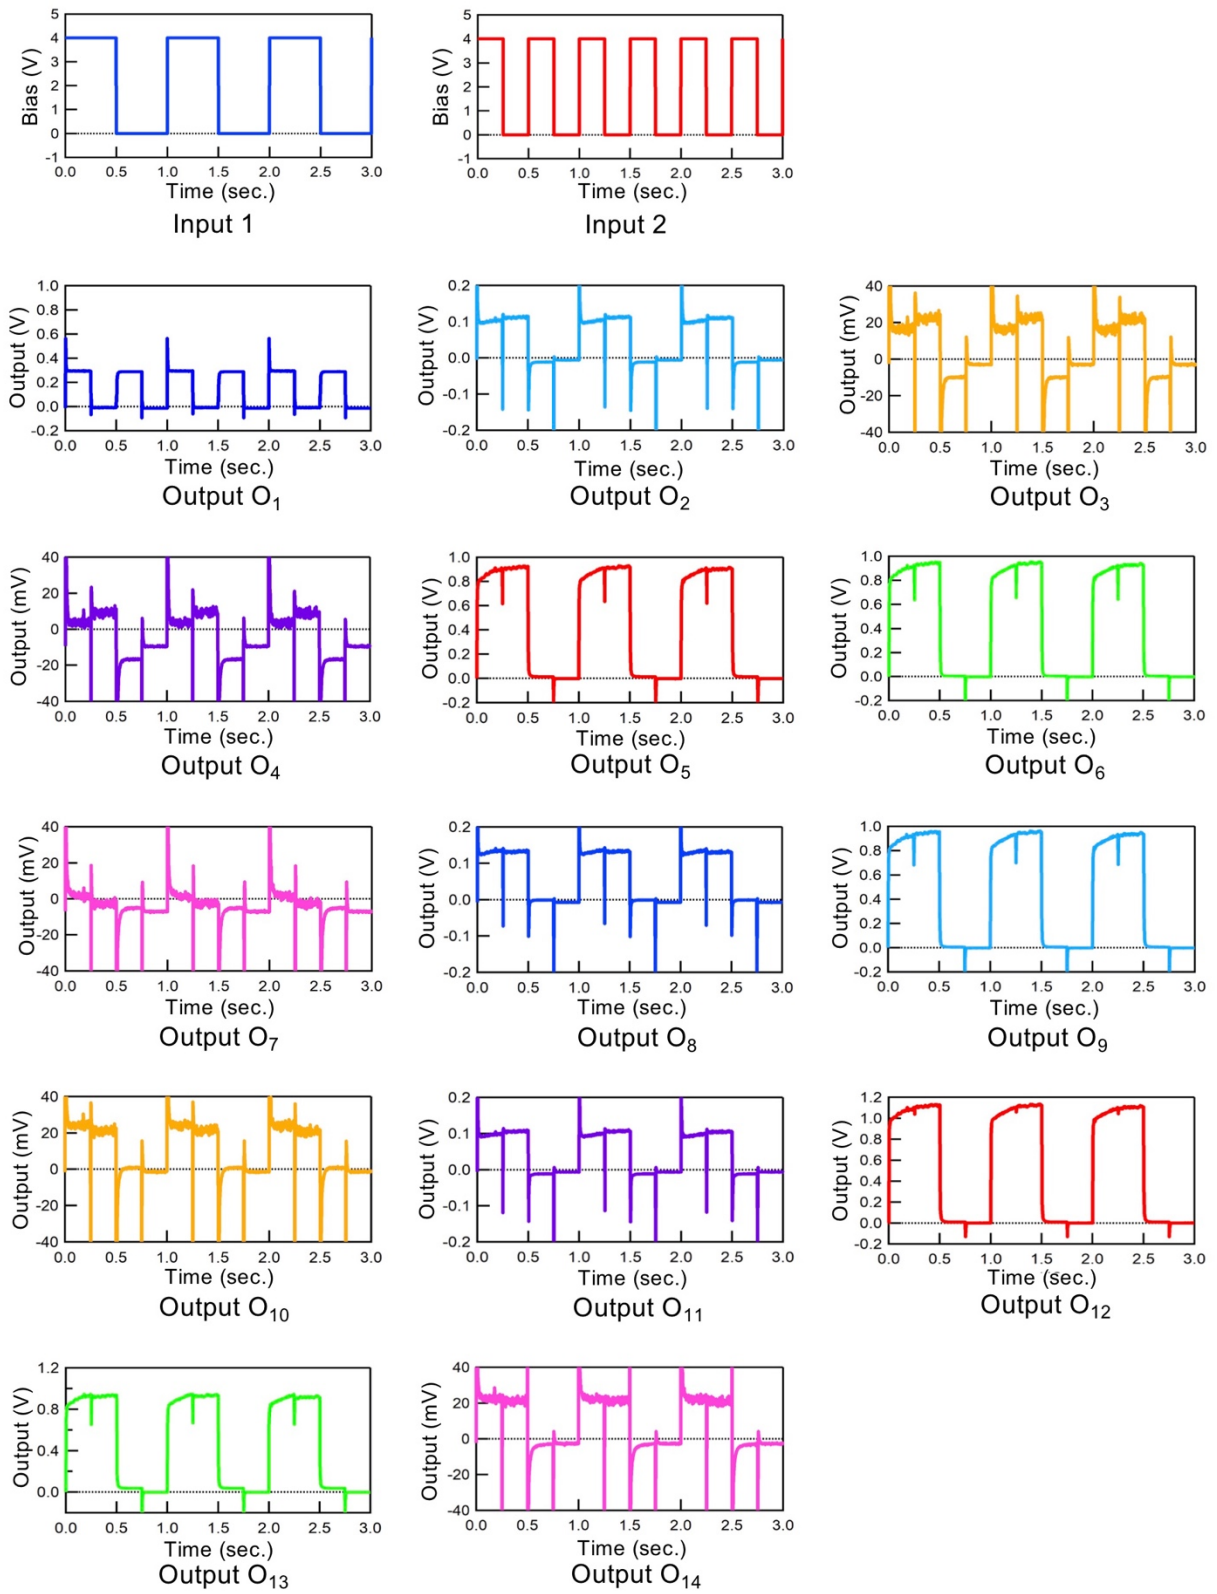

Figure S5. Inputs of 1Hz and 2 Hz square waves and fourteen outputs used for the six logic operations shown in Fig. S4.

Table S2. Weights and a bias used for the logic operations shown in Fig. S4.

|          | AND           | NAND          | OR           | NOR           | XOR           | XNOR          |
|----------|---------------|---------------|--------------|---------------|---------------|---------------|
| $w_1$    | 14.53360267   | -14.53360267  | -13.42211438 | 13.42211438   | -31.93642764  | 31.93642764   |
| $w_2$    | -76.19190972  | 76.19190972   | 41.7576958   | -41.7576958   | 110.15997087  | -110.15997087 |
| $w_3$    | 27.08537777   | -27.08537777  | 5.75201011   | -5.75201011   | -35.4658381   | 35.4658381    |
| $w_4$    | 92.35950635   | -92.35950635  | -83.51453882 | 83.51453882   | -195.62746705 | 195.62746705  |
| $w_5$    | 223.14605355  | -223.14605355 | -207.9388385 | 207.9388385   | -422.03126604 | 422.03126604  |
| $w_6$    | -14.81471796  | 14.81471796   | 23.33365079  | -23.33365079  | 20.19565788   | -20.19565788  |
| $w_7$    | 110.88073398  | -110.88073398 | -58.49396508 | 58.49396508   | -166.4526384  | 166.4526384   |
| $w_8$    | 99.45836774   | -99.45836774  | 26.13528055  | -26.13528055  | -32.75687786  | 32.75687786   |
| $w_9$    | -74.1576281   | 74.1576281    | 46.56313875  | -46.56313875  | 127.36790425  | -127.36790425 |
| $w_{10}$ | -275.55498574 | 275.55498574  | 142.32506532 | -142.32506532 | 484.62814437  | -484.62814437 |
| $w_{11}$ | 6.68380815    | -6.68380815   | -34.31699715 | 34.31699715   | -91.4383641   | 91.4383641    |
| $w_{12}$ | 43.27078136   | -43.27078136  | -44.7379075  | 44.7379075    | -89.96982525  | 89.96982525   |
| $w_{13}$ | -184.09791706 | 184.09791706  | 182.20522359 | -182.20522359 | 371.34652432  | -371.34652432 |
| $w_{14}$ | 29.8768278    | -29.8768278   | -26.70769163 | 26.70769163   | 57.78318296   | -57.78318296  |
| $w_0$    | 1.63799742    | -0.63799742   | -0.71933416  | 1.71933416    | -2.60276472   | 3.60276472    |
